# Supplementary material for: Mutational analysis of uterine cervical cancer that survived multiple rounds of radiotherapy
Source: PubMed Central journal article supplement (PMC6135691; doi:10.18632/oncotarget.25982), 2018-08-24
Supplement: oncotarget-09-32642-s001.pdf [file oncotarget-09-32642-s001.pdf]

## Mutational analysis of uterine cervical cancer that survived multiple rounds of radiotherapy

### SUPPLEMENTARY MATERIALS

|          |        |         |         |          |        |        |        |         |         |          |        |
|----------|--------|---------|---------|----------|--------|--------|--------|---------|---------|----------|--------|
| ABL1     | BCL9   | CHEK1   | EPHB4   | FLT4     | IKZF1  | MAGEA1 | MYB    | PAX7    | PTEN    | SMARCA4  | TOP1   |
| ABL2     | BCR    | CHEK2   | EPHB6   | FN1      | IL2    | MAGI1  | MYC    | PAX8    | PTGS2   | SMARCB1  | TP53   |
| ACVR2A   | BIRC2  | CIC     | ERBB2   | FOXL2    | IL21R  | MALT1  | MYCL1  | PBRM1   | PTPN11  | SMO      | TPR    |
| ADAMTS20 | BIRC3  | CKS1B   | ERBB3   | FOXO1    | IL6ST  | MAML2  | MYCN   | PBX1    | PTPRD   | SMUG1    | TRIM24 |
| AFF1     | BIRC5  | CMPK1   | ERBB4   | FOXO3    | IL7R   | MAP2K1 | MYD88  | PDE4DIP | PTPRT   | SOCS1    | TRIM33 |
| AFF3     | BLM    | COL1A1  | ERCC1   | FOXP1    | ING4   | MAP2K2 | MYH11  | PDGFB   | RAD50   | SOX11    | TRIP11 |
| AKAP9    | BLNK   | CRBN    | ERCC2   | FOXP4    | IRF4   | MAP2K4 | MYH9   | PDGFRA  | RAF1    | SOX2     | TRRAP  |
| AKT1     | BMPR1A | CREB1   | ERCC3   | FZR1     | IRS2   | MAP3K7 | NBN    | PDGFRB  | RALGDS  | SRC      | TSC1   |
| AKT2     | BRAF   | CREBBP  | ERCC4   | G6PD     | ITGA10 | MAPK1  | NCOA1  | PER1    | RARA    | SSX1     | TSC2   |
| AKT3     | BRD3   | CRKL    | ERCC5   | GATA1    | ITGA9  | MAPK8  | NCOA2  | PGAP3   | RB1     | STK11    | TSHR   |
| ALK      | BRIP1  | CRTC1   | ERG     | GATA2    | ITGB2  | MARK1  | NCOA4  | PHOX2B  | RECQL4  | STK36    | UBR5   |
| APC      | BTK    | CSF1R   | ESR1    | GATA3    | ITGB3  | MARK4  | NF1    | PIK3C2B | REL     | SUFU     | UGT1A1 |
| AR       | BUB1B  | CSMD3   | ETS1    | GDNF     | JAK1   | MBD1   | NF2    | PIK3CA  | RET     | SYK      | USP9X  |
| ARID1A   | CARD11 | CTNNA1  | ETV1    | GNA11    | JAK2   | MCL1   | NFE2L2 | PIK3CB  | RHOH    | SYNE1    | VHL    |
| ARID2    | CASC5  | CTNNB1  | ETV4    | GNAQ     | JAK3   | MDM1   | NFKB1  | PIK3CD  | RNASEL  | TAF1     | WAS    |
| ARNT     | CBL    | CYLD    | EXT1    | GNAS     | JUN    | MDM2   | NFKB2  | PIK3CG  | RNF2    | TAF1L    | WHSC1  |
| ASXL1    | CCND1  | CYP2C19 | EXT2    | GPR124   | KAT6A  | MEN1   | NIN    | PIK3R1  | RNF213  | TAL1     | WRN    |
| ATF1     | CCND2  | CYP2D6  | EZH2    | GRM8     | KAT6B  | MET    | NKX2-1 | PIK3R2  | ROS1    | TBX22    | WT1    |
| ATM      | CCNE1  | DAXX    | FAM123B | GUCY1A2  | KDM5C  | MITF   | NLRP1  | PIM1    | RPS6KA2 | TCF12    | XPA    |
| ATR      | CD79A  | DCC     | FANCA   | HCAR1    | KDM6A  | MLH1   | NOTCH1 | PKHD1   | RRM1    | TCF3     | XPC    |
| ATRX     | CD79B  | DDB2    | FANCC   | HIF1A    | KDR    | MLL    | NOTCH2 | PLAG1   | RUNX1   | TCF7L1   | XPO1   |
| AURKA    | CDC73  | DDIT3   | FANCD2  | HLF      | KEAP1  | MLL2   | NOTCH4 | PLCG1   | RUNX1T1 | TCF7L2   | XRCC2  |
| AURKB    | CDH1   | DDR2    | FANCF   | HNF1A    | KIT    | MLL3   | NPM1   | PLEKHG5 | SAMD9   | TCL1A    | ZNF384 |
| AURKC    | CDH11  | DEK     | FANCG   | HOOK3    | KLF6   | MLLT10 | NRAS   | PML     | SBDS    | TET1     | ZNF521 |
| AXL      | CDH2   | DICER1  | FAS     | HRAS     | KRAS   | MMP2   | NSD1   | PMS1    | SDHA    | TET2     |        |
| BAI3     | CDH20  | DNMT3A  | FBXW7   | HSP90AA1 | LAMP1  | MN1    | NTRK1  | PMS2    | SDHB    | TFE3     |        |
| BAP1     | CDH5   | DPYD    | FGFR1   | HSP90AB1 | LCK    | MPL    | NTRK3  | POT1    | SDHC    | TGFBR2   |        |
| BCL10    | CDK12  | DST     | FGFR2   | ICK      | LIFR   | MRE11A | NUMA1  | POU5F1  | SDHD    | TGM7     |        |
| BCL11A   | CDK4   | EGFR    | FGFR3   | IDH1     | LPHN3  | MSH2   | NUP214 | PPARG   | SEPT9   | THBS1    |        |
| BCL11B   | CDK6   | EML4    | FGFR4   | IDH2     | LPP    | MSH6   | NUP98  | PPP2R1A | SETD2   | TIMP3    |        |
| BCL2     | CDK8   | EP300   | FH      | IGF1R    | LRP1B  | MTOR   | PAK3   | PRDM1   | SF3B1   | TLR4     |        |
| BCL2L1   | CDKN2A | EP400   | FLCN    | IGF2     | LTF    | MTR    | PALB2  | PRKAR1A | SGK1    | TLX1     |        |
| BCL2L2   | CDKN2B | EPHA3   | FLI1    | IGF2R    | LTK    | MTRR   | PARP1  | PRKDC   | SH2D1A  | TNFAIP3  |        |
| BCL3     | CDKN2C | EPHA7   | FLT1    | IKBKB    | MAF    | MUC1   | PAX3   | PSIP1   | SMAD2   | TNFRSF14 |        |
| BCL6     | CEBPA  | EPHB1   | FLT3    | IKBKE    | MAFB   | MUTYH  | PAX5   | PTCH1   | SMAD4   | TNK2     |        |

Supplementary Figure 1: Ion amplicseq comprehensive cancer panel gene list.

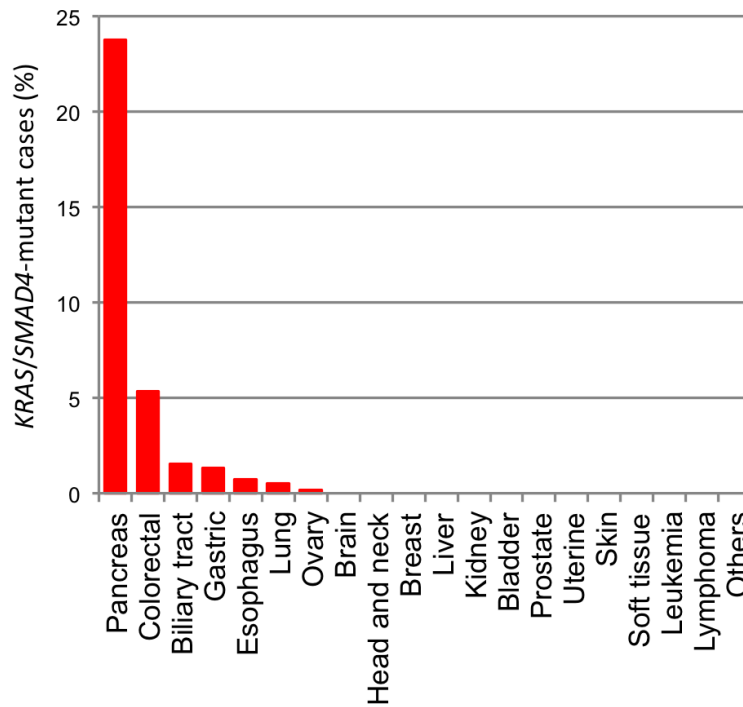

**Supplementary Figure 2: Frequency for simultaneous alterations in *KRAS* and *SMAD4* according to tumor type.**  $n = 22928$ . The analysis was performed using cBioportal [45]. See Supplementary Table 5 for the data set used.

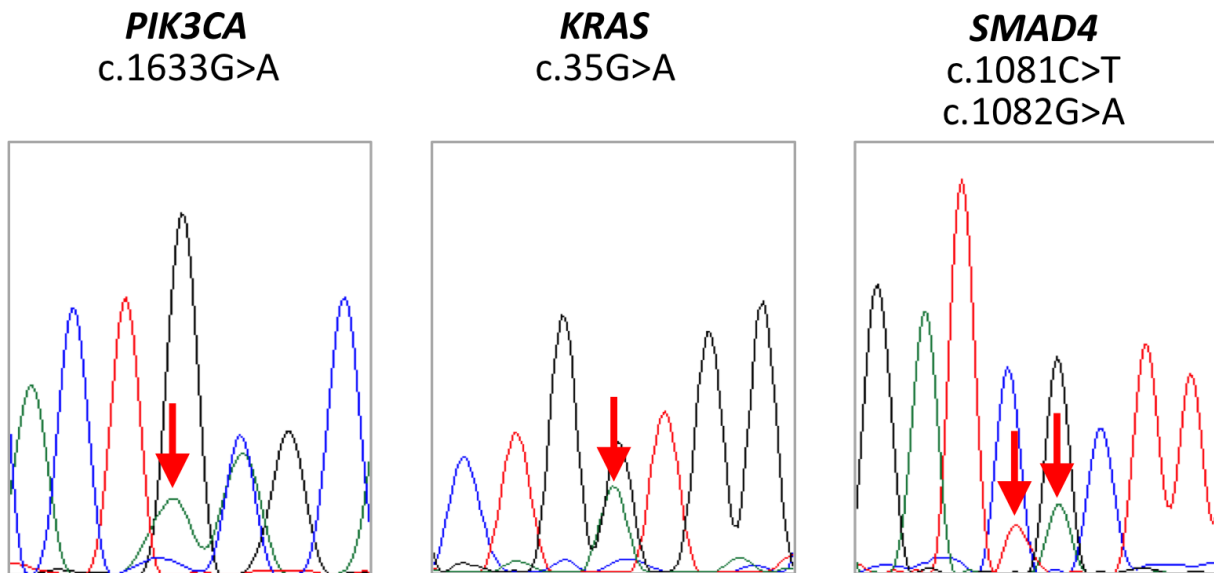

**Supplementary Figure 3: Sanger sequencing results for the mutations in *PIK3CA* (c.1633G>A), *KRAS* (c.35G>A), and *SMAD4* (c.1081C>T and c.1082G>A) in the tumor sample of the first recurrence. Red arrows show variant.**

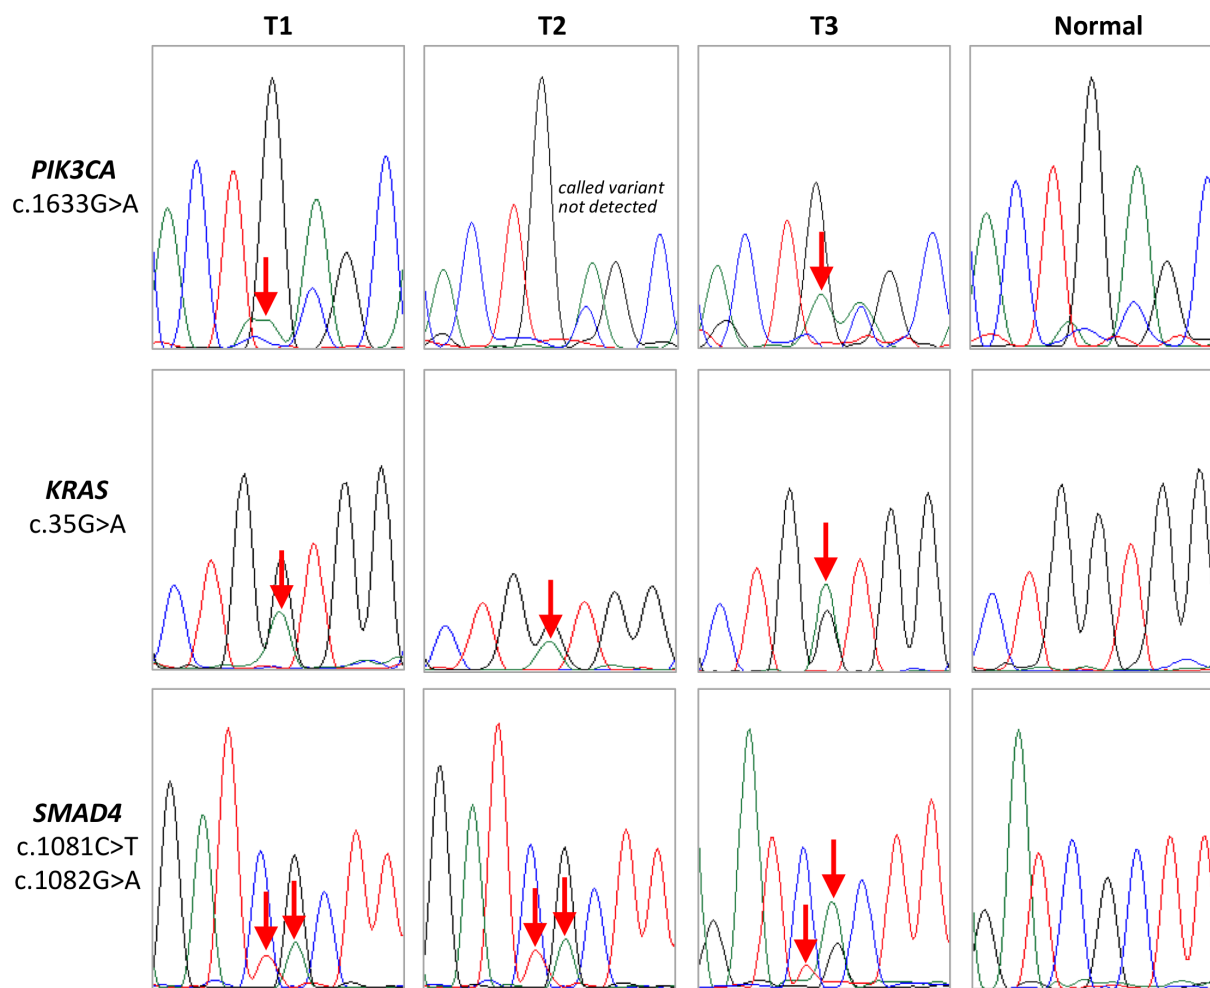

**Supplementary Figure 4: Verification of identified mutations in *PIK3CA*, *KRAS* and *SMAD4* by Sanger sequencing.** Sanger sequencing traces for the genes commonly identified in T1, T2 and T3 are shown. Red arrows show variant. For *PIK3CA*, it is considered that the base next to the somatic mutation (c.1633G>A) in the normal sample is a SNP (A/C).

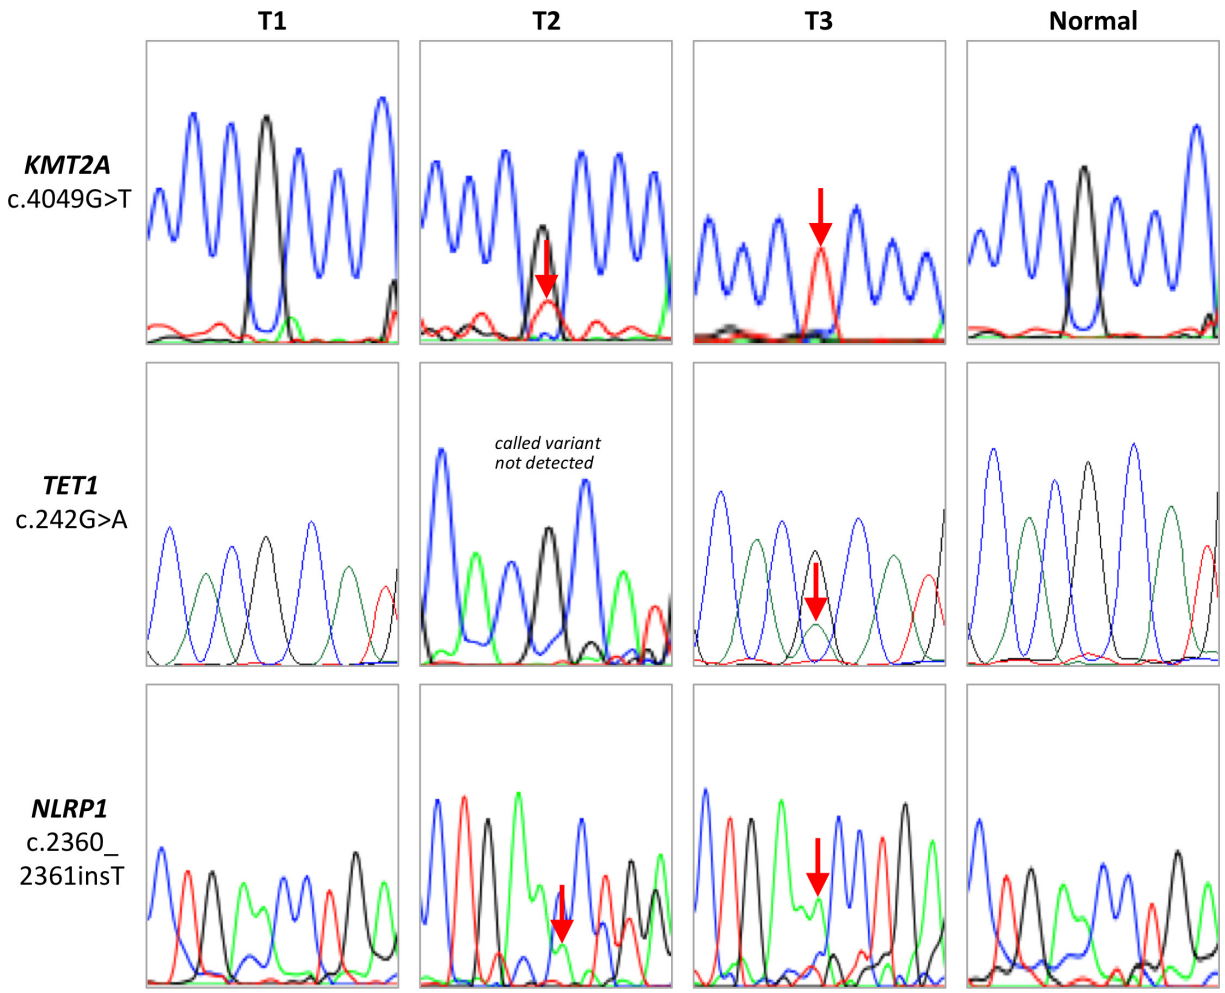

**Supplementary Figure 5: Verification of identified mutations in *KMT2A*, *TET1* and *NLRP1* by Sanger sequencing.** Sanger sequencing traces for the genes commonly identified in T2 and T3 but not in T1 are shown. Red arrows show variant.

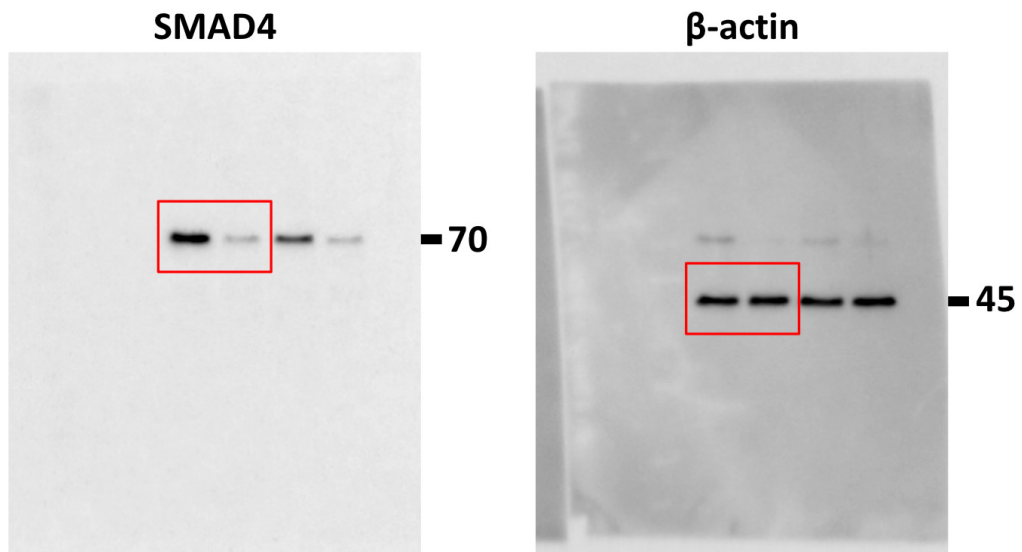

Supplementary Figure 6: Uncropped immunoblots presented in Figure 3C.

**Supplementary Table 1: Overview of targeted amplicon sequencing results**

| Sample | Mapped reads | Reads on target (%) | Coverage depth | Uniformity (%) | Coverage (%) |       |       |       | #of somatic mutation |       |       | #of CNV |
|--------|--------------|---------------------|----------------|----------------|--------------|-------|-------|-------|----------------------|-------|-------|---------|
|        |              |                     |                |                | 1×           | 20×   | 100×  | 500×  | Nonsynon             | Synon | Total |         |
| T1     | 10475349     | 99.11               | 657.5          | 91.51          | 99.64        | 98.02 | 93.43 | 58.70 | 5                    | 0     | 6     | 17      |
| T2     | 10899935     | 99.31               | 686.6          | 88.46          | 99.48        | 97.05 | 91.19 | 57.23 | 11                   | 1     | 12    | 32      |
| T3     | 8804867      | 80.12               | 352.8          | 59.06          | 89.96        | 84.98 | 60.14 | 15.91 | 75                   | 6     | 81    | 345     |
| Normal | 12331540     | 98.28               | 770.2          | 95.30          | 99.82        | 98.82 | 96.70 | 75.49 | NA                   | NA    | NA    | NA      |

Abbreviations: Nonsynon; non-synonymous, synon; synonymous, CNV; copy number variation; NA; not assessible.

**Supplementary Table 2: Somatic non-synonymous mutations identified in this study**

| Gene   | T1                      | T2                      | T3                                                                           |
|--------|-------------------------|-------------------------|------------------------------------------------------------------------------|
| AKAP9  |                         |                         | p.Glu1585Ala                                                                 |
| AKT3   |                         |                         | p.Met460Arg                                                                  |
| ALK    |                         |                         | p.Trp593Cys                                                                  |
| AMER1  |                         |                         | p.Arg871Gln                                                                  |
| ARID1A |                         |                         | p.Ser2142Arg                                                                 |
| ARID2  |                         |                         | p.Pro1019Arg                                                                 |
| ARNT   |                         |                         | p.Ser539Thr                                                                  |
| ATF1   |                         |                         | p.Gln153Arg                                                                  |
| AXL    |                         |                         | p.Tyr498Cys                                                                  |
| BAI3   | p.Cys1269Ter            |                         |                                                                              |
| BCL11B |                         |                         | p.Pro51His                                                                   |
| CD79B  |                         |                         | p.Glu25Val; p.Thr139Ala                                                      |
| CDK12  |                         |                         | p.Glu1193Gly                                                                 |
| CIC    |                         | p.Gly1287Arg            |                                                                              |
| CREBBP |                         |                         | p.Leu1098Pro                                                                 |
| CRTC1  |                         | p.Gly501Arg             |                                                                              |
| CSF1R  |                         |                         | p.Ala505Asp                                                                  |
| CTNNB1 |                         |                         | p.Tyr724Cys                                                                  |
| ERCC5  |                         |                         | p.Asp77Ala                                                                   |
| ETV4   |                         |                         | p.Ile95Ser                                                                   |
| FANCG  |                         |                         | p.Ser344Arg                                                                  |
| FBXW7  |                         |                         | p.Asn621Ser                                                                  |
| FLI1   |                         |                         | p.Val111Leu                                                                  |
| FLT4   |                         |                         | p.Pro138Thr                                                                  |
| FOXP4  |                         | p.Ala610Val             |                                                                              |
| HCAR1  |                         |                         | p.Ala60Ser                                                                   |
| IGF2R  |                         |                         | p.Leu2008Val                                                                 |
| KAT6A  |                         |                         | p.Gln1283Arg; p.Ser1576Cys                                                   |
| KDM5C  |                         |                         | p.Cys1202Arg                                                                 |
| KMT2A  |                         | p.Arg1350Leu            | p.Arg1350Leu                                                                 |
| KMT2C  |                         |                         | p.Ala2223Glu; p.Arg4828Cys                                                   |
| KMT2D  |                         |                         | p.Ser901Phe; p.Pro916Leu; p.Gly1946Val, COSM548519; p.Glu3216Ter, COSM221123 |
| KRAS   | p.Gly12Asp, COSM1135366 | p.Gly12Asp, COSM1135366 | p.Gly12Asp, COSM1135366                                                      |

|         |                                                         |                                                         |                                                   |
|---------|---------------------------------------------------------|---------------------------------------------------------|---------------------------------------------------|
| LCK     |                                                         |                                                         | p.Leu342Gln                                       |
| MAML2   |                                                         |                                                         | p.Ala521Asp                                       |
| MYH11   |                                                         |                                                         | p.Ala1396Asp                                      |
| NCOA1   |                                                         |                                                         | p.Arg1207Gly                                      |
| NIN     |                                                         |                                                         | p.Ser144Asn                                       |
| NLRP1   |                                                         | p.Arg788fs                                              | p.Arg788fs                                        |
| NOTCH1  |                                                         |                                                         | p.Asp2082Glu                                      |
| NOTCH4  |                                                         | p.Arg1793Gln;<br>p.Arg130Lys                            |                                                   |
| NUP98   |                                                         |                                                         | p.Ala1602Asp                                      |
| PAX3    |                                                         |                                                         | p.Met299Lys; p.Ser497Arg                          |
| PAX7    |                                                         |                                                         | p.Ser439Phe                                       |
| PDE4DIP |                                                         |                                                         | p.Lys1104Asn                                      |
| PER1    |                                                         |                                                         | p.Ala1254Asp                                      |
| PIK3CA  | p.Glu545Lys,<br>COSM763                                 | p.Glu545Lys,<br>COSM763                                 | p.Glu545Lys, COSM763                              |
| PMS2    |                                                         |                                                         | p.Gln449Leu, COSM747348                           |
| PTCH1   |                                                         |                                                         | p.Ser640Arg                                       |
| RAF1    |                                                         |                                                         | p.Ala314Val                                       |
| RALGDS  |                                                         |                                                         | p.Ala763Asp                                       |
| RNF213  |                                                         |                                                         | p.Gly1828Ala; p.Ser3939Gly; p.His4391Gln          |
| ROS1    |                                                         |                                                         | p.Val213Gly                                       |
| RUNX1T1 |                                                         |                                                         | p.Gly130Ala                                       |
| SAMD9   |                                                         |                                                         | p.Asn1141fs, COSM602765                           |
| SDHD    |                                                         |                                                         | p.Ala9Gly                                         |
| SETD2   |                                                         |                                                         | p.Gly1563Ala; p.Ser1992Arg                        |
| SMAD4   | p.Arg361Cys,<br>COSM14140;<br>p.Arg361His,<br>COSM14122 | p.Arg361Cys,<br>COSM14140;<br>p.Arg361His,<br>COSM14122 | p.Arg361Cys, COSM14140; p.Arg361His,<br>COSM14122 |
| STK36   |                                                         |                                                         | p.Gln1074Ter                                      |
| SYNE1   |                                                         |                                                         | p.Val3180Gly; p.Asn6582Lys; p.Cys7960Ser          |
| TAF1L   |                                                         |                                                         | p.His1077Arg                                      |
| TCF7L1  |                                                         |                                                         | p.Gln433Ter                                       |
| TET1    |                                                         | p.Arg81His,<br>COSM919743                               | p.Arg81His, COSM919743                            |
| TSC1    |                                                         |                                                         | p.Pro391Thr                                       |
| TSC2    |                                                         |                                                         | p.Ala623Ser                                       |
| USP9X   |                                                         |                                                         | p.Tyr2220Cys                                      |
| XPC     |                                                         |                                                         | p.Cys771Ser                                       |
| ZNF384  |                                                         |                                                         | p.Asn407Lys                                       |

---

**Supplementary Table 3: Prevalence of KRAS and SMAD4 mutations in pancreatic, colorectal, gastric and lung cancers in clinical tumors**

| Cancer type | Control cell lines |                 | Clinical tumors                |                                 |       |                                    |                                 | Data source          |
|-------------|--------------------|-----------------|--------------------------------|---------------------------------|-------|------------------------------------|---------------------------------|----------------------|
|             | # of cell lines    | Sample size (%) | # of case                      |                                 |       | Sample size-matched prevalence (%) |                                 |                      |
|             |                    |                 | <i>KRAS</i> <sup>mt</sup> only | <i>SMAD4</i> <sup>mt</sup> only | Total | <i>KRAS</i> <sup>mt</sup> only     | <i>SMAD4</i> <sup>mt</sup> only |                      |
| Pancreatic  | 3                  | 25              | 310                            | 1                               | 383   | 20                                 | 0                               | QCMG, Nature 2016    |
| Colorectal  | 5                  | 41              | 96                             | 4                               | 212   | 19                                 | 0.8                             | TCGA, Nature 2012    |
| Gastric     | 2                  | 17              | 79                             | 21                              | 287   | 4.6                                | 1.2                             | TCG, Nature 2014     |
| Lung        | 2                  | 17              | 300                            | 31                              | 1144  | 4.4                                | 0                               | TCGA, Nat Genet 2016 |
| Total       | 12                 | 100             | 785                            | 57                              | 2026  | <b>48</b>                          | <b>2.5</b>                      | -                    |

**Supplementary Table 4: Publications containing SF<sub>2</sub> data for *KRAS*<sup>mt</sup>/*SMAD4*<sup>mt</sup> and Control cell lines.** See Supplementary\_Table\_4

**Supplementary Table 5: Data set used for frequency analysis on simultaneous *KRAS*/*SMAD4* alterations in various types of tumors.** See Supplementary\_Table\_5

**Supplementary Table 6: *P* values for statistical analyses for differences in SF<sub>2</sub>**

| Test                     | Data for figure 3A | Data for figure 3B |
|--------------------------|--------------------|--------------------|
| Shapiro–Wilk test        | 0.083              | 0.084              |
| <i>F</i> test            | 0.039              | 0.076              |
| Student's <i>t</i> -test | NA                 | 0.034              |
| Welch's <i>t</i> -test   | 0.010              | NA                 |

Abbreviations: NA, not assessed.
